# Supplementary material for: Increased adipose tissue expression of TLR8 in obese individuals with or without type-2 diabetes: significance in metabolic inflammation
Source: Springer Nature journal article supplement (doi:10.1186/s12950-016-0147-y), 2016-12-01

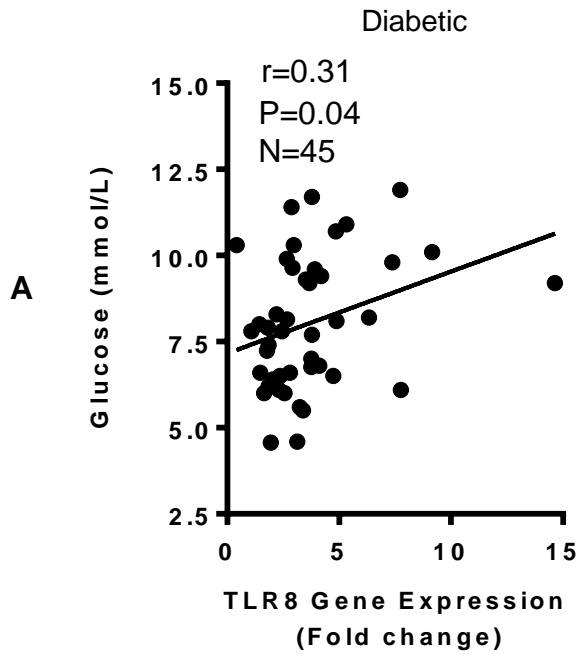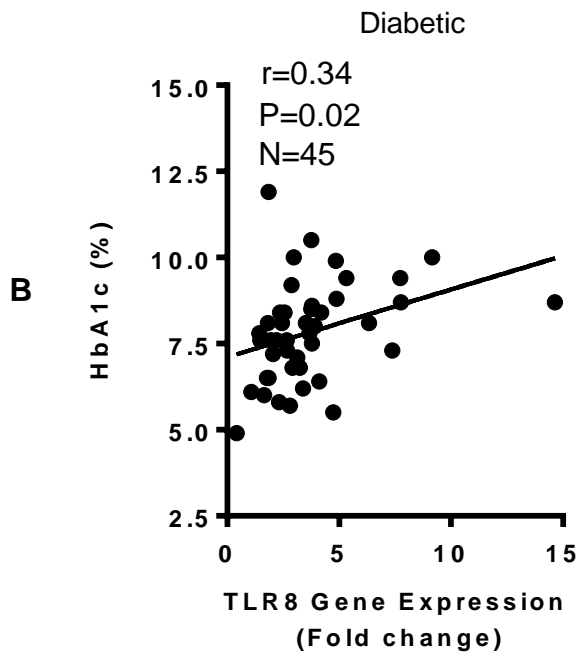

Supplement: MOESM1 [file 11807170]
